# Supplementary material
Source: publisher figshare collection journal article supplement (https://frontiersin.figshare.com/ndownloader/files/26312026)
Supplement: Supplementary file 1 [file 26312026]

## Sheet: original
													Amphiophiura sp.	Anthenoides sp.	Aspidodiadema sp. 02	Aspidodiadema sp. 01	Asteroidea sp. 01	Asteroidea spp.	Astropecten spp.	Astropecten aff. ornatissimus	Astropecten sp.	Astrostole platei	Asteroidea sp. 02	Bathysalenia scrippsae	Echinoidea sp.	Brisinga eucoryne	Brissopsis sp.	Caenopedina sp.	Centrostephanus spp.	Ceramaster sp.	Clypeaster cf. europacificus	Clypeaster isolatus	Clypeaster reticulatus	Coelopleurus spp.	Coronaster sp.	Diadema cf. palmeri	Diadematidae sp. 01	Diadematidae sp. 02	Diadematidae sp. 03	Diadematidae sp. 04	Echinocyamus incertus	Echinus sp.	Eucidaris sp.	Goniasteridae spp.	Goniodiscaster sp.	Cidaridae sp. 02	Habrocidaris argentea	Henricia spp.	Holothuria platei
Project	code	area_code	area	site	station	sample_code	date	depth.m	lat	lon	environment	gear	Amphio_sp	Anthen	Aspido sp2	Aspido sp1	Astero sp1	Astero_spp	Astrop	Astrop_orn	Astrop_sp	Astros	Banded_sea	Bathys_scr	Bicolo_urc	Brisin_euc	Brisso_luz	Caenop	Centro_spp	Cerama	Clypea_eur	Clypea_iso	Clypea_ret	Coelop	Corona	Diadem_pal	Diadem_sp1	Diadem_sp2	Diadem_sp3	Diadem_sp4	Echino_inc	Echinu	Eucida	Gonias	Goniod	Green_Cid	Habroc_arg	Henric_spp	Holoth_pla
CIMAR22	C22.S21.A	D	Desventuradas	D.2	1	21	22-10-2016	150	-26.379	-79.8893	Island	A	0	0	0	0	0	0	0	0	0	0	0	0	0	0	0	0	0	0	1	1	0	0	0	0	0	0	0	0	0	0	0	0	0	0	0	0	0
CIMAR23	C22.S20.A	D	Desventuradas	D.2	2	20	22-10-2016	130	-26.3283	-79.8903	Island	A	0	0	0	0	0	0	0	0	0	0	0	0	0	0	0	0	1	0	0	1	0	0	0	0	0	0	0	0	0	0	0	0	0	0	0	0	0
CIMAR24	C22.S22.A	D	Desventuradas	D.1	3	22	23-10-2016	340	-26.334	-80.093	Island	A	0	0	0	0	0	0	0	0	0	0	0	0	0	0	0	0	0	0	0	0	0	0	0	0	0	0	0	0	0	0	0	0	0	0	0	0	0
CIMAR25	C22.S17.A	D	Desventuradas	D.1	4	17	23-10-2016	130	-26.26	-80.103	Island	A	0	0	0	0	0	0	0	0	0	0	0	0	0	0	0	0	0	0	0	0	0	0	0	0	0	0	0	0	0	0	0	0	0	0	0	0	0
CIMAR36	C22.S18.RV	D	Desventuradas	D.1	15	18	23-10-2016	50	-26.3039	-80.0644	Island	RV	0	0	0	0	0	0	0	0	0	1	1	0	1	0	0	0	1	0	0	0	0	0	0	0	0	0	0	0	0	0	0	0	0	0	0	0	0
CIMAR37	C22.S21.RV	D	Desventuradas	D.2	16	21	22-10-2016	150	-26.379	-79.8893	Island	RV	0	0	0	0	0	0	0	0	0	0	0	0	0	0	0	0	0	0	0	1	0	0	0	0	0	0	0	0	0	0	0	0	0	0	0	0	0
CIMAR44	C22.S20.RV	D	Desventuradas	D.2	23	20	22-10-2016	130	-26.329	-79.8885	Island	RV	0	0	0	0	0	0	0	0	0	0	0	0	1	0	0	0	1	0	0	1	0	0	0	0	0	0	0	0	0	0	0	0	0	0	0	0	1
CIMAR45	C22.S17.RV	D	Desventuradas	D.1	24	17	23-10-2016	133	-26.2606	-80.105	Island	RV	0	0	0	0	0	0	0	0	0	0	0	0	0	0	0	0	0	0	0	1	0	0	0	0	0	0	0	0	0	0	0	0	0	0	0	0	0
Desventuradas	Desventuradas.01.D01	D	Desventuradas	D.1	76	D01	12-07-1966	165	-26.333	-80.033	Island	T	0	0	0	0	0	0	0	0	0	0	0	0	0	0	0	0	0	0	0	0	0	0	0	0	0	0	0	0	0	0	0	0	0	0	0	0	0
Desventuradas	Desventuradas.02.D02	D	Desventuradas	D.1	77	D02	07-12-1965	75	-26.267	-80.1	Island	T	0	0	0	0	0	0	0	0	0	0	0	0	0	0	0	0	1	0	0	1	0	0	0	0	0	0	0	0	0	0	0	0	0	0	0	0	0
Desventuradas	Desventuradas.03.D03	D	Desventuradas	D.1	78	D03	NA	75	-26.2847	-80.2528	Island	T	0	0	0	0	0	0	0	0	0	0	0	0	0	0	0	0	0	0	0	0	0	0	0	0	0	0	0	0	0	0	0	0	0	0	0	0	1
Japanese Cruises	Epic-Jamstec.3A1	D	Desventuradas	D.2	92	SPG3A1	02-04-2019	208	-26.4961	-79.818	Island	A	0	0	0	0	0	0	0	0	0	0	0	0	0	0	0	0	0	0	0	0	0	0	0	0	0	0	0	0	0	0	0	0	0	0	0	0	0
Japanese Cruises	Epic-Jamstec.3A2	D	Desventuradas	D.2	93	SPG3A2	02-04-2019	211	-26.4571	-79.8907	Island	A	0	1	0	0	0	0	0	0	0	0	0	0	0	0	0	0	0	0	0	0	0	0	0	0	0	0	0	0	0	0	0	0	0	0	0	0	0
Apolo	Apolo.Rov.02	EI	Easter Island	EI.1	85	Rov 02	09-01-2014	280	-27.2377	-109.486	seamount	RV	0	0	0	0	0	0	0	0	0	0	0	0	0	0	0	0	0	0	0	0	0	0	0	0	0	0	0	0	0	0	0	0	0	0	0	0	0
Apolo	Apolo.Rov.03	EI	Easter Island	EI.1	86	Rov 03	09-01-2014	170	-27.2367	-109.487	seamount	RV	0	0	0	0	0	0	0	0	0	0	0	0	0	0	0	0	0	0	0	0	0	0	0	1	1	1	0	1	0	0	0	0	0	0	0	0	0
Pukao	Pukao.Dive.1	EI	Easter Island	EI.2	87	Dive 1	16-03-2016	160	-26.9203	-110.266	seamount	RV	0	0	0	0	0	0	0	0	1	0	0	0	0	0	0	0	0	0	0	0	0	0	0	1	1	1	0	1	0	0	0	0	1	1	0	0	0
Pukao	Pukao.Dive.3	EI	Easter Island	EI.2	88	Dive 3	16-03-2016	185	-26.924	-110.267	seamount	RV	0	0	0	0	0	0	0	0	1	0	0	0	0	0	0	0	0	0	0	0	0	0	0	1	1	1	0	1	0	0	0	0	0	0	0	0	0
Pukao	Pukao.Dive.4	EI	Easter Island	EI.2	89	Dive 4	16-03-2016	244	-26.9319	-110.276	seamount	RV	0	0	0	0	0	0	0	0	0	0	0	0	0	0	0	0	0	0	0	0	0	0	0	0	1	0	1	0	0	0	0	0	0	0	0	0	0
Pukao	Pukao.Dive.5	EI	Easter Island	EI.2	90	Dive 5	16-03-2016	223	-26.9368	-110.265	seamount	RV	0	0	0	0	0	0	0	0	0	0	0	0	0	0	0	0	0	0	0	0	1	0	0	0	0	0	0	0	0	0	0	0	1	0	0	0	0
Pukao	Pukao.Dive.6	EI	Easter Island	EI.2	91	Dive 6	16-03-2016	163	-26.919	-110.269	seamount	RV	0	0	0	0	0	0	0	0	1	0	0	0	0	0	0	0	0	0	0	0	0	0	0	1	1	1	0	1	0	0	0	0	1	0	0	0	0
CIMAR32	C22.S31.A	JF	Juan Fernández	JF.3	11	31	05-11-2016	160	-33.8046	-80.857	Island	A	0	0	0	0	0	0	0	0	0	0	0	0	0	0	0	0	0	0	0	0	0	0	0	0	0	0	0	0	0	0	0	0	0	0	0	0	0
CIMAR33	C22.JF1.A	JF	Juan Fernández	JF.2	12	JFI	10-11-2016	370	-33.6067	-78.5071	seamount	A	0	0	0	0	0	0	0	0	0	0	0	0	0	0	0	0	0	0	0	0	0	0	0	0	0	0	0	0	0	0	0	0	0	0	0	0	0
CIMAR34	C22.JF1B.A	JF	Juan Fernández	JF.2	13	JFIB	10-11-2016	370	-33.6302	-78.4804	seamount	A	0	0	0	0	0	1	0	0	0	0	0	0	0	0	0	0	0	0	0	0	0	0	0	0	0	0	0	0	0	0	0	0	0	0	0	0	0
CIMAR35	C22.JF2.A	JF	Juan Fernández	JF.2	14	JF2	11-11-2016	350	-33.5883	-77.7121	seamount	A	0	0	0	0	0	1	0	0	0	0	0	0	0	0	0	0	0	0	0	0	0	0	0	0	0	0	0	0	0	0	0	0	0	0	0	0	0
Selkirk	Selkirk.obis.SLK01	JF	Juan Fernández	JF.1	82	SLK01	14-12-1965	170	-33.5717	-78.915	Island	T	0	0	0	0	0	0	0	0	0	0	0	0	0	0	0	0	0	0	0	0	0	0	0	0	0	0	0	0	0	0	0	0	0	0	0	0	0
Selkirk	Selkirk.obis.SLK02	JF	Juan Fernández	JF.1	83	SLK02	14-12-1965	170	-33.5817	-78.9167	Island	T	0	0	0	0	0	0	0	0	0	0	0	0	0	0	0	0	1	0	0	0	0	0	0	0	0	0	0	0	0	0	0	0	0	0	0	0	0
Selkirk	Selkirk.obis.SLK03	JF	Juan Fernández	JF.1	84	SLK03	14-12-1965	175	-33.65	-78.983	Island	T	0	0	0	0	0	0	0	0	0	0	0	0	0	0	0	0	0	0	0	0	0	0	0	0	0	0	0	0	0	0	0	0	0	0	0	0	0
Russian Cruises	Rusian.1A	MS	Salaz y Gómez Ridge	MS.1	26	1A	06-05-1987	282	-25.2017	-100.823	seamount	T	0	0	0	0	0	0	0	0	0	0	0	0	0	0	0	0	0	0	0	0	0	0	0	0	0	0	0	0	0	0	0	0	0	0	0	0	0
Russian Cruises	Rusian.1B	MS	Salaz y Gómez Ridge	MS.1	27	1B	06-05-1987	300	-25.2033	-100.831	seamount	T	0	0	0	0	0	0	0	0	0	0	0	0	0	0	0	0	0	0	0	1	0	0	0	0	0	0	0	0	1	0	0	0	0	0	0	0	0
Russian Cruises	Rusian.1C	MS	Salaz y Gómez Ridge	MS.1	28	1C	22-08-1972	307.5	-25.2	-100.883	seamount	T	0	0	0	0	0	0	0	0	0	0	0	1	0	0	0	0	0	0	0	0	0	0	0	0	0	0	0	0	1	0	0	0	0	0	0	0	0
Russian Cruises	Rusian.1D	MS	Salaz y Gómez Ridge	MS.1	29	1D	01-07-1983	300	-25.2	-100.93	seamount	T	0	0	0	0	0	0	0	0	0	0	0	0	0	0	0	1	0	0	0	0	0	0	0	0	0	0	0	0	0	0	0	0	0	0	0	0	0
Russian Cruises	Rusian.2A	MS	Salaz y Gómez Ridge	MS.2	30	2A	05-10-1984	295	-25.9667	-100.603	seamount	T	0	0	0	0	0	0	0	0	0	0	0	0	0	0	0	0	0	0	0	0	0	0	0	0	0	0	0	0	0	0	0	0	0	0	0	0	0
Russian Cruises	Rusian.2B	MS	Salaz y Gómez Ridge	MS.2	31	2B	06-05-1987	340	-25.9967	-100.667	seamount	T	0	0	0	0	0	0	0	0	0	0	0	0	0	0	0	0	0	0	0	0	0	0	0	0	0	0	0	0	1	0	0	0	0	0	0	0	0
Russian Cruises	Rusian.2C	MS	Salaz y Gómez Ridge	MS.2	32	2C	01-07-1983	320	-25.92	-100.69	seamount	T	0	0	0	0	0	0	0	0	0	0	0	0	0	0	0	0	0	1	0	0	0	0	0	0	0	0	0	0	0	0	0	0	0	0	0	0	0
Russian Cruises	Rusian.3A	MS	Salaz y Gómez Ridge	MS.3	33	3A	07-05-1987	355	-25.1233	-99.68	seamount	T	0	0	0	0	0	0	0	0	0	0	0	1	0	0	0	0	0	0	0	0	0	0	0	0	0	0	0	0	1	0	0	0	0	0	0	0	0
Russian Cruises	Rusian.3B	MS	Salaz y Gómez Ridge	MS.3	34	3B	05-05-1987	340	-25.12	-99.7133	seamount	T	0	0	0	0	0	0	0	0	0	0	0	0	0	0	0	0	0	0	0	0	0	0	0	0	0	0	0	0	0	0	0	0	0	0	0	0	0
Russian Cruises	Rusian.3C	MS	Salaz y Gómez Ridge	MS.3	35	3C	01-07-1983	400	-25.13	-99.75	seamount	T	0	0	0	1	1	0	0	1	0	0	0	0	0	0	0	1	0	0	0	0	0	0	0	0	0	0	0	0	0	0	0	0	0	0	1	1	0
Russian Cruises	Rusian.5A	MS	Salaz y Gómez Ridge	MS.4	36	5A	08-05-1987	277.5	-25.0817	-97.4267	seamount	T	0	0	0	0	0	0	0	0	0	0	0	0	0	0	0	0	0	0	0	0	0	0	0	0	0	0	0	0	0	0	0	0	0	0	0	0	0
Russian Cruises	Rusian.5B	MS	Salaz y Gómez Ridge	MS.4	37	5B	03-05-1987	328	-25.0283	-97.44	seamount	T	0	0	0	0	0	0	0	0	0	0	0	0	0	0	0	0	0	0	0	0	0	0	0	0	0	0	0	0	0	0	0	0	0	0	0	0	0
Russian Cruises	Rusian.5C	MS	Salaz y Gómez Ridge	MS.4	38	5C	04-05-1987	218	-25.0833	-97.465	seamount	T	0	0	0	0	0	0	0	0	0	0	0	0	0	0	0	0	0	0	0	0	0	0	0	0	0	0	0	0	0	0	0	0	0	0	0	0	0
Russian Cruises	Rusian.5D	MS	Salaz y Gómez Ridge	MS.4	39	5D	04-05-1987	262.5	-25.0792	-97.47	seamount	T	0	0	0	0	0	0	0	0	0	0	0	0	0	0	0	0	0	0	0	1	0	0	0	0	0	0	0	0	1	0	0	0	0	0	0	0	0
Russian Cruises	Rusian.5E	MS	Salaz y Gómez Ridge	MS.4	40	5E	08-05-1987	273.5	-25.08	-97.4833	seamount	T	0	0	0	0	0	0	0	0	0	0	0	0	0	0	0	0	0	0	0	0	0	0	0	0	0	0	0	0	1	0	0	0	0	0	0	0	0
Russian Cruises	Rusian.5F	MS	Salaz y Gómez Ridge	MS.4	41	5F	08-05-1987	279.5	-25.0642	-97.4975	seamount	T	0	0	0	0	0	0	0	0	0	0	0	0	0	0	0	0	0	0	0	0	0	0	0	0	0	0	0	0	0	0	0	0	0	0	0	0	0
Russian Cruises	Rusian.5G	MS	Salaz y Gómez Ridge	MS.4	42	5G	04-05-1987	255	-25.1211	-97.5033	seamount	T	0	0	0	0	0	0	0	0	0	0	0	1	0	0	0	0	0	0	0	0	0	0	0	0	0	0	0	0	0	0	0	0	0	0	0	0	0
Russian Cruises	Rusian.5H	MS	Salaz y Gómez Ridge	MS.4	43	5H	01-07-1983	300	-25.05	-97.53	seamount	T	0	0	0	1	0	0	1	1	0	0	0	1	0	0	0	1	0	0	0	0	0	1	0	0	0	0	0	0	0	0	0	0	0	0	0	0	0
Russian Cruises	Rusian.5I	MS	Salaz y Gómez Ridge	MS.4	44	5I	04-05-1987	345	-25.0333	-97.5333	seamount	T	0	0	0	0	0	0	0	0	0	0	0	0	0	0	0	0	0	0	0	0	0	0	0	0	0	0	0	0	0	0	0	0	0	0	0	0	0
Japanese Cruises	Epic-Jamstec.6A1	MS	Salaz y Gómez Ridge	MS.5	97	SPG6A1	02-13-2019	264	-26.1798	-102.974	seamount	A	0	0	0	0	1	0	0	0	0	0	0	1	0	0	0	0	0	0	0	0	0	0	0	0	1	1	0	0	0	0	0	0	0	0	0	0	0
Russian Cruises	Rusian.18R	NN	North Nazca	NN.1	72	18R	01-07-1983	300	-22.13	-81.3	seamount	T	0	0	1	0	0	0	0	0	0	0	0	0	0	0	0	0	0	0	0	0	0	0	0	0	0	0	0	0	0	0	0	0	0	0	0	1	0
Russian Cruises	Rusian.19	NN	North Nazca	NN.1	73	19	01-07-1983	300	-21.48	-81.66	seamount	T	0	0	1	0	0	0	0	0	0	0	0	0	0	0	0	0	0	0	0	0	0	0	0	0	0	0	0	0	0	0	0	0	0	0	0	1	0
Russian Cruises	Rusian.22R	NN	North Nazca	NN.1	74	22R	01-07-1983	300	-21.71	-82.12	seamount	T	1	0	1	0	0	0	0	0	0	0	0	0	0	0	0	0	0	0	0	0	0	0	0	0	0	0	0	0	0	0	0	0	0	0	0	0	0
CIMAR26	C22.SSF9.A	SGR	Salaz y Gómez and Nazca junction	SGR.5	5	SF9	27-10-2016	200	-25.7774	-83.3163	seamount	A	0	1	0	0	0	0	0	0	0	0	0	1	0	0	0	0	0	0	0	0	0	0	0	0	0	0	0	0	0	0	0	0	0	0	0	0	0
CIMAR27	C22.SSF8.A	SGR	Salaz y Gómez and Nazca junction	SGR.5	6	SF8	27-10-2016	285	-25.7166	-83.0116	seamount	A	0	0	0	0	0	0	0	0	0	0	0	1	0	0	0	0	0	0	0	0	0	0	0	0	0	0	0	0	0	0	0	0	0	0	0	0	0
CIMAR28	C22.SSF6.A	SGR	Salaz y Gómez and Nazca junction	SGR.6	7	SF6	28-10-2016	175	-25.5535	-82.3963	seamount	A	0	0	0	0	0	0	0	0	0	0	0	0	0	0	0	0	0	0	0	0	0	0	0	0	0	0	0	0	0	0	0	0	0	0	0	0	0
CIMAR29	C22.SSF7.A	SGR	Salaz y Gómez and Nazca junction	SGR.6	8	SF7	28-10-2016	175	-25.6557	-82.4742	seamount	A	0	0	0	0	0	0	0	0	0	0	0	0	0	0	0	0	0	0	0	0	0	0	0	0	0	0	0	0	0	0	0	0	0	0	0	0	0
CIMAR30	C22.SSFX.A	SGR	Salaz y Gómez and Nazca junction	SGR.8	9	SFX	31-10-2016	230	-25.0792	-82.0067	seamount	A	0	0	0	0	0	1	0	0	0	0	0	0	0	0	0	0	0	0	0	0	0	0	0	0	0	0	0	0	0	0	0	0	0	0	0	0	0
CIMAR31	C22.SSF5.A	SGR	Salaz y Gómez and Nazca junction	SGR.7	10	SF5	01-11-2016	180	-25.4272	-81.8806	seamount	A	0	0	0	0	0	0	0	0	0	0	0	0	0	0	1	0	0	0	0	0	0	0	0	0	0	0	0	0	0	0	0	0	0	0	0	0	0
CIMAR39	C22.SSF9.RV	SGR	Salaz y Gómez and Nazca junction	SGR.5	18	SF9	27-10-2016	203	-25.779	-83.3187	seamount	RV	0	1	0	0	0	0	0	0	0	0	0	0	0	0	0	0	0	0	0	0	0	0	0	0	0	0	0	0	0	0	0	0	0	0	0	0	0
CIMAR41	C22.SSF7.RV	SGR	Salaz y Gómez and Nazca junction	SGR.6	20	SF7	28-10-2016	170	-25.6562	-82.4732	seamount	RV	0	1	0	0	0	0	0	0	0	0	0	0	0	0	0	0	0	0	0	0	0	0	0	0	0	0	0	0	0	0	0	0	0	0	0	0	0
CIMAR43	C22.SSFX.RV	SGR	Salaz y Gómez and Nazca junction	SGR.8	22	SFX	31-10-2016	220	-25.0806	-82.0052	seamount	RV	0	0	0	0	0	0	0	0	0	0	0	0	0	0	0	0	0	0	0	0	0	0	0	0	0	0	0	0	0	0	0	0	0	0	0	0	0
CIMAR46	C22.SSF6.RV	SGR	Salaz y Gómez and Nazca junction	SGR.6	25	SF6	28-10-2016	176	-25.5531	-82.3965	seamount	RV	0	0	0	0	0	0	0	0	0	0	0	0	0	0	0	0	0	0	0	0	0	0	0	0	0	0	0	0	0	0	0	0	0	0	0	0	0
Russian Cruises	Rusian.8	SGR	Salaz y Gómez and Nazca junction	SGR.14	45	8	01-07-1983	400	-25	-88.39	seamount	T	0	0	0	1	0	0	0	1	0	0	0	0	0	1	0	1	0	0	0	0	0	0	0	0	0	0	0	0	0	1	0	0	0	0	0	0	0
Russian Cruises	Rusian.9	SGR	Salaz y Gómez and Nazca junction	SGR.2	46	9	01-07-1983	158	-25.59	-86.9	seamount	T	0	0	0	0	0	0	0	0	0	0	0	0	0	0	0	0	0	0	0	0	0	0	0	0	0	0	0	0	0	0	0	0	0	0	0	0	0
Russian Cruises	Rusian.10A	SGR	Salaz y Gómez and Nazca junction	SGR.2	47	10A	29-04-1987	390	-25.65	-86.565	seamount	T	0	0	0	0	0	0	0	0	0	0	0	0	0	0	0	0	0	0	0	0	0	0	0	0	0	0	0	0	1	0	0	0	0	0	0	0	0
Russian Cruises	Rusian.10B	SGR	Salaz y Gómez and Nazca junction	SGR.2	48	10B	28-04-1987	397.5	-25.8	-86.5667	seamount	T	0	0	0	0	0	0	0	0	0	0	0	0	0	1	0	0	0	0	0	0	0	0	0	0	0	0	0	0	0	0	0	0	0	0	0	0	0
Russian Cruises	Rusian.10C	SGR	Salaz y Gómez and Nazca junction	SGR.2	49	10C	11-10-1984	390	-25.7333	-86.5833	seamount	T	0	0	0	0	0	0	0	0	0	0	0	0	0	0	0	0	0	0	0	0	0	0	0	0	0	0	0	0	0	0	0	0	0	0	0	0	0
Russian Cruises	Rusian.10D	SGR	Salaz y Gómez and Nazca junction	SGR.2	50	10D	01-07-1983	390	-25.71	-86.65	seamount	T	0	0	0	1	0	0	0	1	0	0	0	0	0	0	0	0	0	0	0	0	0	0	1	0	0	0	0	0	0	0	0	1	0	0	0	0	0
Russian Cruises	Rusian.12A	SGR	Salaz y Gómez and Nazca junction	SGR.1	51	12A	29-09-1980	220	-25.6383	-85.35	seamount	T	0	0	0	0	0	0	0	0	0	0	0	1	0	0	0	0	1	0	0	0	0	0	0	0	0	0	0	0	0	0	0	0	0	0	0	0	0
Russian Cruises	Rusian.12B	SGR	Salaz y Gómez and Nazca junction	SGR.1	52	12B	27-09-1980	235	-25.7383	-85.3683	seamount	T	0	0	0	0	0	0	0	0	0	0	0	1	0	0	0	0	1	0	0	0	0	0	0	0	0	0	0	0	0	0	0	0	0	0	0	0	0
Russian Cruises	Rusian.12C	SGR	Salaz y Gómez and Nazca junction	SGR.1	53	12C	27-04-1987	160	-25.7	-85.4	seamount	T	0	0	0	0	0	0	0	0	0	0	0	0	0	0	0	0	0	0	0	0	0	0	0	0	0	0	0	0	0	0	0	0	0	0	0	0	0
Russian Cruises	Rusian.12D	SGR	Salaz y Gómez and Nazca junction	SGR.1	54	12D	27-04-1987	220	-25.7333	-85.4167	seamount	T	0	0	0	0	0	0	0	0	0	0	0	0	0	0	0	0	0	0	0	0	0	0	0	0	0	0	0	0	0	0	0	0	0	0	0	0	0
Russian Cruises	Rusian.12E	SGR	Salaz y Gómez and Nazca junction	SGR.1	55	12E	26-04-1987	165	-25.6667	-85.4167	seamount	T	0	0	0	0	0	0	0	0	0	0	0	0	0	0	0	0	1	0	0	1	0	0	0	0	0	0	0	0	0	0	0	0	0	0	0	0	0
Russian Cruises	Rusian.12F	SGR	Salaz y Gómez and Nazca junction	SGR.1	56	12F	14-10-1980	180	-25.64	-85.4233	seamount	T	0	0	0	0	0	0	0	0	0	0	0	0	0	0	0	0	0	0	0	0	0	0	0	0	0	0	0	0	0	0	0	0	0	0	0	0	0
Russian Cruises	Rusian.12G	SGR	Salaz y Gómez and Nazca junction	SGR.1	57	12G	26-04-1987	162	-25.6417	-85.425	seamount	T	0	0	0	0	0	0	0	0	0	0	0	0	0	0	0	0	0	0	0	0	0	0	0	0	0	0	0	0	0	0	0	0	0	0	0	0	0
Russian Cruises	Rusian.12H	SGR	Salaz y Gómez and Nazca junction	SGR.1	58	12H	04-10-1980	175	-25.645	-85.4267	seamount	T	0	0	0	0	0	0	0	0	0	0	0	0	0	0	0	0	1	0	0	0	0	0	0	0	0	0	0	0	0	0	0	0	0	0	0	0	0
Russian Cruises	Rusian.12I	SGR	Salaz y Gómez and Nazca junction	SGR.1	59	12I	08-11-1979	225	-25.6667	-85.4333	seamount	T	0	0	0	0	0	0	0	0	0	0	0	0	0	0	0	0	0	0	0	0	0	0	0	0	0	0	0	0	0	0	0	0	0	0	0	0	0
Russian Cruises	Rusian.12J	SGR	Salaz y Gómez and Nazca junction	SGR.1	60	12J	04-10-1980	190	-25.62	-85.4383	seamount	T	0	0	0	0	0	0	0	0	0	0	0	0	0	0	0	0	0	0	0	0	0	0	0	0	0	0	0	0	1	0	0	0	0	0	0	0	0
Russian Cruises	Rusian.12K	SGR	Salaz y Gómez and Nazca junction	SGR.1	61	12K	01-07-1983	169	-25.65	-85.45	seamount	T	0	0	0	0	0	0	1	0	0	0	0	0	0	0	0	1	0	1	0	0	0	1	0	0	0	0	0	0	0	0	0	1	0	0	0	1	0
Russian Cruises	Rusian.12L	SGR	Salaz y Gómez and Nazca junction	SGR.1	62	12L	05-10-1980	190	-25.6433	-85.465	seamount	T	0	0	0	0	0	0	0	0	0	0	0	0	0	0	0	0	1	0	0	0	0	0	0	0	0	0	0	0	0	0	0	0	0	0	0	0	0
Russian Cruises	Rusian.12M	SGR	Salaz y Gómez and Nazca junction	SGR.1	63	12M	05-10-1980	215	-25.6317	-85.4683	seamount	T	0	0	0	0	0	0	0	0	0	0	0	0	0	0	0	0	0	0	0	0	0	0	0	0	0	0	0	0	0	0	0	0	0	0	0	0	0
Russian Cruises	Rusian.12N	SGR	Salaz y Gómez and Nazca junction	SGR.1	64	12N	26-04-1987	242.5	-25.575	-85.475	seamount	T	0	0	0	0	0	0	0	0	0	0	0	0	0	0	0	0	0	0	0	0	0	0	0	0	0	0	0	0	0	0	0	0	0	0	0	0	0
Russian Cruises	Rusian.12O	SGR	Salaz y Gómez and Nazca junction	SGR.1	65	12O	27-04-1987	255	-25.6083	-85.5333	seamount	T	0	0	0	0	0	0	0	0	0	0	0	1	0	0	0	0	0	0	0	0	0	0	0	0	0	0	0	0	0	0	0	0	0	0	0	0	0
Russian Cruises	Rusian.13A	SGR	Salaz y Gómez and Nazca junction	SGR.3	66	13A	01-07-1983	169	-24.7	-85.45	seamount	T	0	0	0	1	0	0	0	0	0	0	0	0	0	0	0	0	0	0	0	0	0	0	0	0	0	0	0	0	1	0	0	0	0	0	0	0	0
Russian Cruises	Rusian.13B	SGR	Salaz y Gómez and Nazca junction	SGR.3	67	13B	16-10-1980	320	-24.7883	-85.4567	seamount	T	0	0	0	0	0	0	0	0	0	0	0	0	0	0	0	0	0	0	0	0	0	0	0	0	0	0	0	0	0	0	0	0	0	0	0	0	0
Russian Cruises	Rusian.15A	SGR	Salaz y Gómez and Nazca junction	SGR.4	68	15A	25-04-1987	285	-25.8833	-84.3833	seamount	T	0	0	0	0	0	0	0	0	0	0	0	0	0	0	0	0	0	0	0	0	0	0	0	0	0	0	0	0	0	0	0	0	0	0	0	0	0
Russian Cruises	Rusian.15B	SGR	Salaz y Gómez and Nazca junction	SGR.4	69	15B	26-04-1987	280	-25.9	-84.4	seamount	T	0	0	0	0	0	0	0	0	0	0	0	0	0	0	0	0	0	0	0	0	0	0	0	0	0	0	0	0	0	0	0	0	0	0	0	0	0
Russian Cruises	Rusian.16	SGR	Salaz y Gómez and Nazca junction	SGR.11	70	16	17-10-1980	295	-23.9267	-84.7167	seamount	T	0	0	0	0	0	0	0	0	0	0	0	0	0	0	0	0	0	0	0	0	0	0	0	0	0	0	0	0	1	0	0	0	0	0	0	0	0
Russian Cruises	Rusian.17R	SGR	Salaz y Gómez and Nazca junction	SGR.13	71	17R	01-07-1983	300	-23.46	-83.33	seamount	T	0	0	0	0	0	0	0	0	0	0	0	0	0	0	0	0	0	0	0	0	0	0	0	0	0	0	0	0	1	0	0	0	0	0	0	0	0
North American Cruise	American.HD73	SGR	Salaz y Gómez and Nazca junction	SGR.1	75	HD73	1964	220	-25.733	-85.416	seamount	T	0	0	0	0	0	0	0	0	0	0	0	1	0	0	0	0	0	0	0	0	0	0	0	0	0	0	0	0	1	0	0	0	0	0	0	0	0
Russian Cruises	Rusian.12P	SGR	Salaz y Gómez and Nazca junction	SGR.1	79	12P	15-10-1980	280	-25.6	-85.4483	seamount	T	0	0	0	0	0	0	0	0	0	0	0	0	0	0	0	0	0	0	0	0	0	0	0	0	0	0	0	0	1	0	0	0	0	0	0	0	0
SGR	SGR.01.SGR.01	SGR	Salaz y Gómez and Nazca junction	SGR.10	80	SGR 01	18-10-1966	60	-24.5417	-83.3208	seamount	T	0	0	0	0	0	0	0	0	0	0	0	0	0	0	0	0	0	0	0	0	0	0	0	0	0	0	0	0	0	0	1	0	0	0	0	0	0
SGR	SGR.02.SGR.02	SGR	Salaz y Gómez and Nazca junction	SGR.4	81	SGR 02	28-09-1980	210	-25.8617	-84.595	seamount	T	0	0	0	0	0	0	0	0	0	0	0	0	0	0	0	0	0	0	0	0	0	0	0	0	0	0	0	0	1	0	0	0	0	0	0	0	0
Japanese Cruises	Epic-Jamstec.4A1	SGR	Salaz y Gómez and Nazca junction	SGR.7	94	SPG4A1	02-06-2019	530	-25.4206	-81.7566	seamount	A	0	0	0	0	0	1	0	0	0	0	0	0	0	0	0	0	0	0	0	0	0	0	0	0	0	0	0	0	0	1	0	1	0	0	0	0	0
Japanese Cruises	Epic-Jamstec.4A2	SGR	Salaz y Gómez and Nazca junction	SGR.7	95	SPG4A2	02-06-2019	234	-25.4086	-81.7691	seamount	A	0	0	0	0	0	0	0	0	0	0	0	1	0	0	0	0	0	0	0	0	0	0	0	0	0	0	0	0	0	0	0	0	0	0	0	0	0
Japanese Cruises	Epic-Jamstec.5A1	SGR	Salaz y Gómez and Nazca junction	SGR.12	96	SPG5A1	02-09-2019	547	-25.5917	-89.1314	seamount	A	0	0	0	1	0	0	0	0	0	0	0	0	0	0	0	0	0	0	0	0	0	0	1	0	0	0	0	0	0	0	0	0	0	0	0	0	0
[truncated: 39 more columns]

## Sheet: metadata
		Taxa in red were considered as poorly classified OTUs and were now included in the analyses
	Gear types
	RV	ROV (video record)
	A	Agassiz trawl
	T	Srimp otter-trawls
